RESEARCH ARTICLE

# Prognostic role of neutrophil–lymphocyte ratio in nasopharyngeal carcinoma: A meta-analysis

Yukinori Takenaka\*, Takahiro Kitamura, Ryohei Oya, Naoki Ashida, Kotaro Shimizu, Kazuya Takemura, Yoshifumi Yamamoto, Atsuhiko Uno

Department of Otorhinolaryngology-Head and Neck Surgery, Osaka General Medical Center, Osaka, Japan

\* [ysktakenaka@gmail.com](mailto:ysktakenaka@gmail.com)

## Abstract

### Background

Inflammatory markers are used to predict prognosis of nasopharyngeal carcinoma (NPC). Previous reports of neutrophil-to-lymphocyte ratio (NLR) and NPC mortality are inconsistent. This study aimed to quantify the prognostic impact of NLR on NPC.

### Methods

The primary outcome was overall survival (OS), and the secondary outcomes were disease-specific survival (DSS), progression-free survival (PFS) and distant metastasis-free survival (DMFS). We systematically searched electronic databases, identified articles reporting an association between NLR and NPC prognosis. Hazard ratios (HRs) and 95% confidence intervals (CIs) were extracted, and pooled HRs for each outcome were estimated using random effect models.

### Results

Nine studies enrolling 5397 patients were included in the analyses. NLR greater than the cutoff value was associated with poor overall survival (HR 1.51, 95% CI 1.27–1.78), disease-specific survival (HR 1.44, 95% CI 1.22–1.71), progression-free survival (HR 1.53, 95% CI 1.22–1.90), and distant metastasis-free survival (HR 1.83, 95% CI 1.14–2.95).

### Conclusions

Elevated NLR predicts worse OS, DSS, PFS and DMFS in patients with NPC.

### Introduction

Nasopharyngeal carcinoma (NPC) is a cancer arising from the nasopharynx epithelium. NPC differs from other head and neck cancers in its characteristics, the most distinct one being its

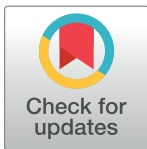

## OPEN ACCESS

**Citation:** Takenaka Y, Kitamura T, Oya R, Ashida N, Shimizu K, Takemura K, et al. (2017) Prognostic role of neutrophil–lymphocyte ratio in nasopharyngeal carcinoma: A meta-analysis. PLoS ONE 12(7): e0181478. <https://doi.org/10.1371/journal.pone.0181478>

**Editor:** Jeffrey Chalmers, The Ohio State University, UNITED STATES

**Received:** April 16, 2017

**Accepted:** June 30, 2017

**Published:** July 17, 2017

**Copyright:** © 2017 Takenaka et al. This is an open access article distributed under the terms of the [Creative Commons Attribution License](https://creativecommons.org/licenses/by/4.0/), which permits unrestricted use, distribution, and reproduction in any medium, provided the original author and source are credited.

**Data Availability Statement:** All relevant data are within the paper.

**Funding:** The author(s) received no specific funding for this work.

**Competing interests:** The authors have declared that no competing interests exist.

epidemiology. NPC is very rare in most part of the world with the incidence rate of less than 1 per 100,000 person-years [1]. However, the incidence rate is as high as 3.4–21.4 in the southern part of China. Southeast Asia, North Africa, the Middle East and the Arctic are the intermediate risk regions [1]. WHO classifies NPC into three types: nonkeratinizing carcinoma, keratinizing carcinoma and basaloid squamous cell carcinoma [2]. The nonkeratinizing carcinoma, previously subdivided to differentiated and undifferentiated nonkeratinizing carcinoma, is the predominant histologic type, and is invariably associated with the Epstein–Barr virus (EBV) [3]. Because of its anatomic location, surgical treatment is not usually selected, and radiotherapy (RT) is the first-line treatment for non-metastatic NPC. According to the National Comprehensive Cancer Network guideline [4], definitive RT is recommended for stage I NPC, whereas chemoradiation therapy (CRT) is recommended for stages II–IV NPC without distant metastasis. Platinum-based chemotherapy is recommended for metastatic disease. In some institutions, induction or adjuvant chemotherapy is administered in conjunction with CRT. However, the use of induction chemotherapy or adjuvant chemotherapy is controversial [5]. Because of its toxicity and, if any, small additional effect, not all patients with advanced NPC will benefit from the additional chemotherapy. Therefore, it is important to identify patients with unfavorable prognosis, who are most likely to benefit from intensified treatment. To identify groups with poor prognosis, prognostic and predictive biomarkers have been sought.

Various biomarkers, including plasma EBV DNA, D-dimer, lactate dehydrogenase, and inflammatory markers, have been found to be associated with the prognosis of NPC [6–10]. Neutrophil–lymphocyte ratio (NLR) is an inflammatory marker, validated as a prognostic marker for various types of cancer [11]. Neutrophil and lymphocyte counts in peripheral blood are routinely measured in clinical settings, and little additional effort is needed for the calculation of NLR. However, inconsistent results have been reported for the association between NLR and prognosis of NPC [12–18].

This study was conducted with an aim to resolve this inconsistency and to quantify the impact of NLR on prognosis of NPC.

## Materials and methods

### Search strategy

This study was conducted in accordance with the guidelines for Preferred Reporting Items for Systematic Reviews and Meta-Analyses [19]. We conducted a literature search on the association of NPC and NLR in electronic databases (PubMed [www.ncbi.nlm.nih.gov/pubmed](http://www.ncbi.nlm.nih.gov/pubmed) and Scopus [www.elsevier.com/online-tools/scopus](http://www.elsevier.com/online-tools/scopus)) for articles published between January 1, 2000 and December 31, 2016. The search terms were “nasopharynx,” “nasopharyngeal,” “cancer,” “carcinoma,” “malignancy,” and “neutrophil.” References in the retrieved articles were manually searched for associated studies.

### Study selection

Inclusion criteria were as follows: (1) studies reporting the prognostic impact of pretreatment NLR in peripheral blood on NPC and (2) studies where a hazard ratio (HR) and 95% confidence interval (CI) or a *p*-value for overall survival (OS), disease-specific survival (DSS), progression-free survival (PFS), or distant metastasis-free survival (DMFS) were available. We excluded nonhuman studies and those in languages other than English. Two of the authors (YT and TK) evaluated the electronically searched titles independently. All potentially relevant publications were retrieved in full. Inter-reviewer agreement was assessed by Cohen’s kappa. Disagreement was resolved by consensus.

## Data extraction

The following data were extracted: name of first author; year of publication; institution and country; number of patients; disease stage; treatment modality; cutoff methods and cutoff values for NLR; and HRs, 95% CIs, and *p* values for OS, DSS, PFS, and DMFS. The HRs, 95% CIs, and *p* values were extracted preferentially from multivariate analyses, or HRs were extracted from univariate analyses. The Newcastle–Ottawa Scale (NOS) was used to assess the quality of the included study [20], and studies with a score of 6 or more were considered high-quality studies.

## Statistical analysis

The studies differed in the inclusion criteria, cutoff values and study quality. Therefore, we conducted the present meta-analyses with a random effect model using Comprehensive Meta-Analysis version 2 (Biostat, Englewood, NJ, USA). The meta-analysis was conducted initially in all included studies for OS, DSS, PFS, and DMFS. One study divided patients into three groups and showed HRs that were compared with the lowest NLR group [13]. For the present study, mean HRs were used as representatives of the study. One study showed results for two different NLR cutoff values—median value and the 80th percentile [18]. The latter result was used for data analysis for our study. Sensitivity analysis was performed by sequential omission of each individual study. Subgroup analyses for OS were conducted for disease stage and NLR cutoff value. The comparison between subgroups was tested with the Q-test for heterogeneity. Publication bias was assessed by the funnel plot and tested by Egger's regression intercept test. Heterogeneity was assessed by Cochran Q and  $I^2$  statistics. All statistical tests were two-sided, and statistical significance was defined by a *p*-value of <0.05.

## Results

### Literature search results

Electronic database searches retrieved 127 records (Fig 1). We examined titles and abstracts, and excluded duplicated entries, review articles, and articles written in languages other than English. The full texts of the 13 studies selected were then inspected according to exclusion criteria, and, finally, nine studies enrolling 5397 patients were included in the present study [9, 10, 12–18]. Cohen's kappa for inter-reviewer agreement was 0.79, which indicated substantial agreement.

### Characteristics of the selected studies

Table 1 shows the characteristics of the included studies. All studies were published after 2011. The outcomes analyzed in these studies were OS in six studies [9, 13, 15–18], DSS in two studies [12, 14], PFS in three studies [13, 15, 17], and DMFS in two studies [12, 18]. The included stages were metastatic disease in two studies [15, 16], non-metastatic disease in six studies [10, 12–14, 17, 18], and mixed metastatic and non-metastatic diseases in one study [9]. The receiver operating characteristic curve was used to determine cutoff value for NLR in four studies [10, 12, 14, 17]. One report was from Singapore [18], and the rest were from China [9, 12–18]. As the result, the subjects of the present analysis belonged to the Chinese ethnicity. The mean NOS was 6 (standard deviation 1). Neutrophils and lymphocytes were counted using an automated hematology analyzer in one study [9], and the other studies [10, 12–18] did not specify the methods.

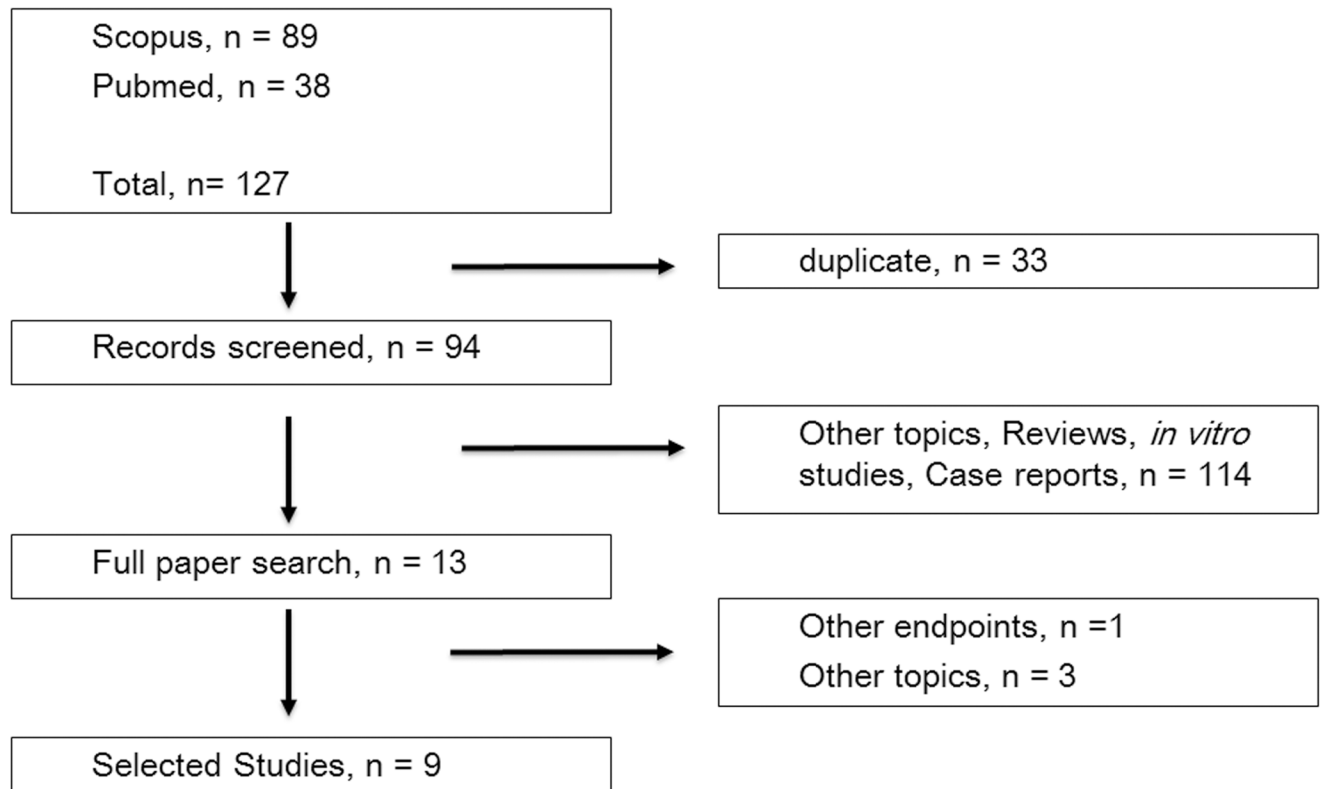

**Fig 1. Flow diagram of article selection.**

<https://doi.org/10.1371/journal.pone.0181478.g001>

**Table 1. Characteristics of the included studies.**

| year of publication | 1st author | country   | outcome   | stage                                   | treatment    | No. of patients | cutoff method   | cutoff value        | analysis of HR                      | NOS |
|---------------------|------------|-----------|-----------|-----------------------------------------|--------------|-----------------|-----------------|---------------------|-------------------------------------|-----|
| 2011                | An X       | China     | DSS, DMFS | non-metastatic                          | (C)RT        | 363             | ROC             | 3.73                | multivariate                        | 6   |
| 2012                | He JR      | China     | OS, PFS   | non-metastatic                          | (C)RT        | 1410            | quartile        | 1.54, 1.99, 2.74    | multivariate (OS), univariate (PFS) | 5   |
| 2013                | Chang H    | China     | DSS       | non-metastatic                          | (C)RT        | 1895            | ROC             | 2.5                 | multivariate                        | 7   |
| 2014                | Chen C     | China     | OS, PFS   | metastatic                              | chemotherapy | 211             | not reported    | 5                   | multivariate                        | 5   |
| 2015                | Jin Y      | China     | OS        | metastatic                              | chemotherapy | 229             | median          | 3.60                | multivariate                        | 6   |
| 2015                | Sun W      | China     | OS, PFS   | non-metastatic                          | (C)RT        | 251             | ROC             | 2.6 (OS), 2.7 (PFS) | multivariate                        | 6   |
| 2016                | Chua ML    | Singapore | OS, DMFS  | non-metastatic, locoregionally advanced | (C)RT        | 380             | 80th percentile | 4.2                 | multivariate                        | 6   |
| 2016                | Li JP      | China     | OS        | mixed                                   | (C)RT        | 409             | median          | 2.48                | multivariate                        | 8   |
| 2016                | Li XH      | China     | DSS       | non-metastatic                          | (C)RT        | 249             | ROC             | 2.5                 | multivariate                        | 5   |

Abbreviations: No, number, HR, hazard ratio, (C)RT, (chemo) radiation therapy, DSS, disease-specific survival, DMFS, distant metastasis-free survival, NOS, Newcastle–Ottawa Scale, OS, overall survival, PFS, progression-free survival, ROC, receiver operating characteristic.

<https://doi.org/10.1371/journal.pone.0181478.t001>

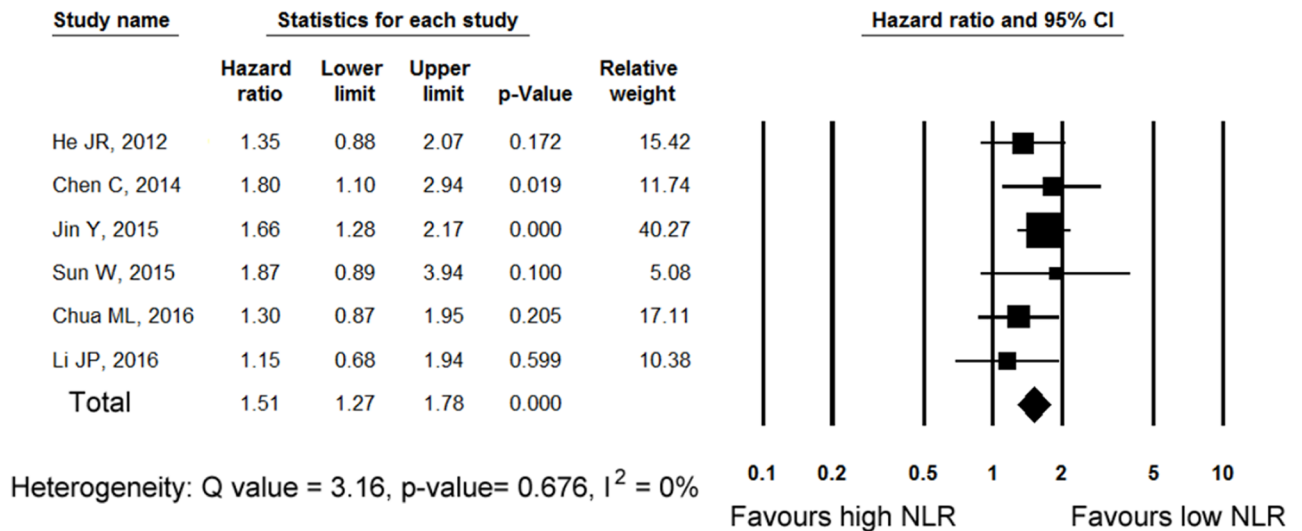

**Fig 2. Forest plot showing hazard ratios for overall survival for neutrophil-lymphocyte ratio (NLR).** The squares represent HRs for each study. The sizes of the squares and the horizontal lines crossing the squares represent the weight of the study in the meta-analysis and 95% confidence intervals, respectively. The middle and width of the diamond indicates the pooled hazard ratio and its 95% confidence interval.

<https://doi.org/10.1371/journal.pone.0181478.g002>

### Overall survival

Cutoff values of NLR for dichotomization ranged from 2.48 to 5 (median 3.6). Among six studies [9, 13, 15–18] reporting HRs for OS, four [9, 13, 17, 18] reported statistically non-significant HRs ( $p = 0.100$  to  $0.599$ ). The pooled analysis for the six studies enrolling 2890 patients is shown in Fig 2. Overall, a higher NLR was associated with worse OS (HR 1.51, 95% CI 1.27–1.78). Significant overall HR of 1.51 was partly on account of the two significant study-specific effects of Jin et al [16] and Chen et al [15]. Result of sensitivity analysis is shown in S1A Fig. The pooled HR was significant when any single study was removed. The effect of NLR on OS between subgroups is shown in Table 2. The metastatic subgroup showed a slightly higher HR than the non-metastatic subgroup (HR 1.69 and 1.39, 95% CI, 1.34–2.14 and 95% CI, 1.05–1.82, respectively). However, the  $p$ -value for heterogeneity between the subgroups was not significant ( $p = 0.276$ ). When the studies were divided into groups according to the median NLR cutoff value of 3.6, the high-cutoff subgroup had a slightly higher HR than the low-cutoff subgroup (HR 1.59 and 1.36, 95% CI, 1.30–1.94 and 95% CI, 0.86–2.14, respectively), and the impact of elevated NLR in the low-cutoff subgroup was not significant ( $p = 0.184$ ). Moreover, the difference between subgroups was not significant ( $p$  for heterogeneity =  $0.504$ ).

**Table 2. Effect of NLR on OS between subgroups.**

| Subgroup       | No. of studies | No. of patients | HR    | (95% CI)      | p-value for HR | Q-value | p-value (heterogeneity) | I <sup>2</sup> (%) |
|----------------|----------------|-----------------|-------|---------------|----------------|---------|-------------------------|--------------------|
| Stage          |                |                 |       |               |                | 1.188   | 0.276                   |                    |
| non-metastatic | 3              | 2041            | 1.386 | (1.054–1.822) | 0.020          | 0.733   | 0.693                   | 0                  |
| metastatic     | 2              | 440             | 1.692 | (1.341–2.136) | <0.001         | 0.079   | 0.779                   | 0                  |
| Cut-off value  |                |                 |       |               |                | 0.447   | 0.504                   |                    |
| < 3.6          | 2              | 660             | 1.359 | (0.864–2.138) | 0.184          | 1.098   | 0.295                   | 8.906              |
| ≥3.6           | 3              | 820             | 1.585 | (1.295–1.940) | <0.001         | 1.297   | 0.523                   | 0                  |

Abbreviations: No, number, HR, hazard ratio, CI, confidence interval

<https://doi.org/10.1371/journal.pone.0181478.t002>

## Disease-specific survival, progression-free survival, and distant metastasis-free survival

Fig 3A–3C show forest plots for DSS, PFS, and DMFS, respectively. Three studies [10, 12, 14] enrolling 2507 patients reported HRs for DSS. All three studies reported statistically significant HRs, and the pooled HR for DSS was 1.44 (95% CI 1.22–1.71). The results of the sensitivity analysis are shown in S1B Fig. Although the study by Chang et al. [14] contributed largely to the pooled HR, the pooled HR was still significant when the study was removed. Three studies [13, 15, 17] enrolling 1872 patients reported HRs for PFS. One [15] of the three studies reported statistically non-significant HRs, and the pooled HR for PFS was 1.53 (95% CI 1.22–1.90). Result of sensitivity analysis is shown in S1C Fig. The pooled HR was significant when any single study was omitted. The combined HR of two studies [12, 18] enrolling 743 patients for DMFS was 1.83 (95% CI 1.14–2.95).

## Publication bias

Fig 4 shows a funnel plot of HRs for OS. The plot showed no apparent asymmetry, and Egger's test of the intercept did not suggest publication bias ( $p = 0.715$ ). Funnel plots for DSS, PFS, and DMFS are not shown because the numbers of studies for each outcome were small.

## Discussion

NPC has a multifactorial causation. Risk factors for NPC include EBV infection, intake of salt-preserved fish, smoking, and chronic sinonasal tract inflammation, several types of human leukocyte antigen, and other genetic variations [1, 21]. Of these factors, EBV infection contributes the most to the carcinogenesis of NPC. The EBV genome is almost universally present in tumor cells of nonkeratinizing NPC [22]. The latent EBV genes encode proteins characteristic of NPC, such as Epstein-Barr nuclear antigen 1, latent membrane proteins (LMPs) 1, 2A, and 2B [22]. Some of these EBV gene products interfere with antigen-processing, recognition, and cytotoxicity in the immunity system [23–25], resulting in immune evasion. In contrast, EBV-encoded small RNAs trigger inflammation and attract tumor-associated macrophages and T lymphocytes, leading to tumor progression [26, 27]. Thus, EBV-infected NPC cells harness immune cells and facilitate a protumorigenic inflammatory tumor microenvironment.

Because of their anti- or protumor effect, immune cells in the tumor microenvironment can be used as prognostic markers. Intratumoral CD8 T cells expressing programmed death-1 were associated with poor prognosis for NPC [28]. In contrast, tumor-associated macrophages and Foxp3+ tumor-infiltrating lymphocytes correlated with favorable prognosis for NPC [29, 30]. Quantification of immune cells in tumor tissues requires advanced techniques and considerable effort. Tissue biomarker measurement using biopsy samples is associated with a concern of heterogeneity within a tumor. Therefore, research has been undertaken to investigate the prognostic ability of circulating immune cells. NPC patients with a higher CD4 to CD8 ratio in circulating lymphocytes showed better DMFS than counterparts with a lower ratio [31]. Among patients with EBV-associated NPC, low circulating CD19+ B cells predicted poorer PFS and OS [32]. High circulating CD44+ lymphocytes was an unfavorable marker in patients with NPC treated with CRT [33]. Although the specific subtypes of immune cells in circulation are associated with tumor progression, meticulous classification of subtypes may not be required for prognostic prediction. A lower lymphocyte count in circulating blood of patients with NPC was associated with worse OS and PFS [13, 16, 17, 34, 35]. In contrast, elevated neutrophil count in those patients was associated with worse OS, DSS, and DMFS [13, 36, 37]. To simultaneously consider the positive prognostic impact of lymphocytes and negative impact of

A

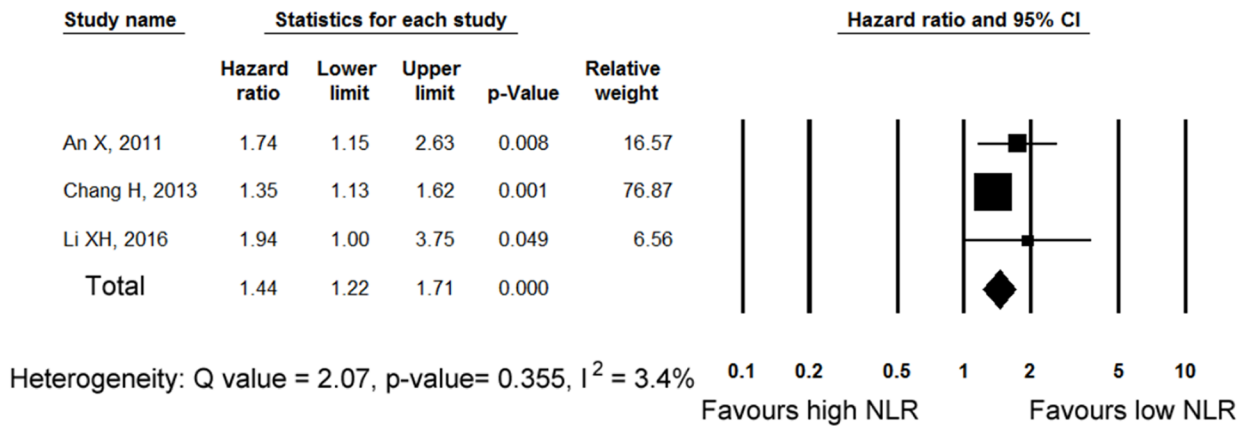

B

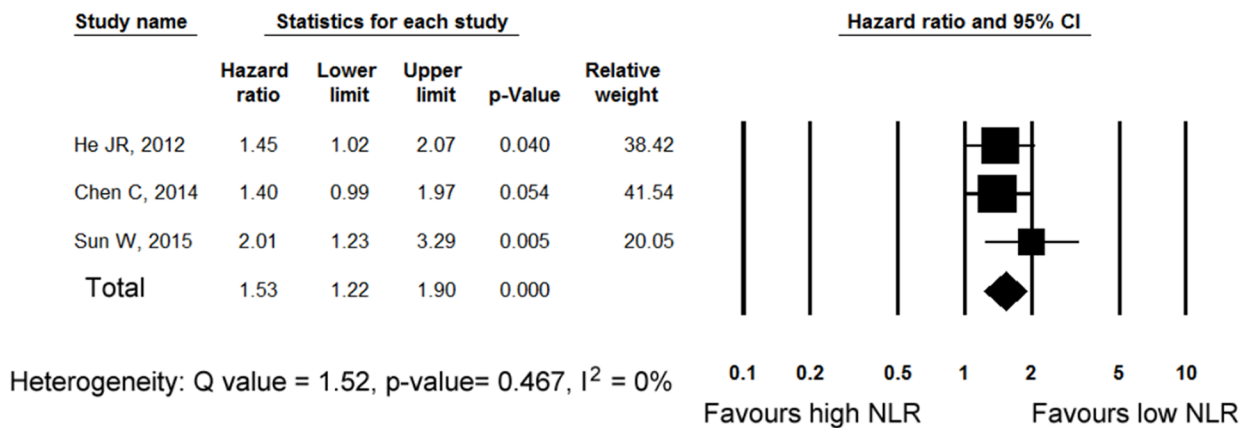

C

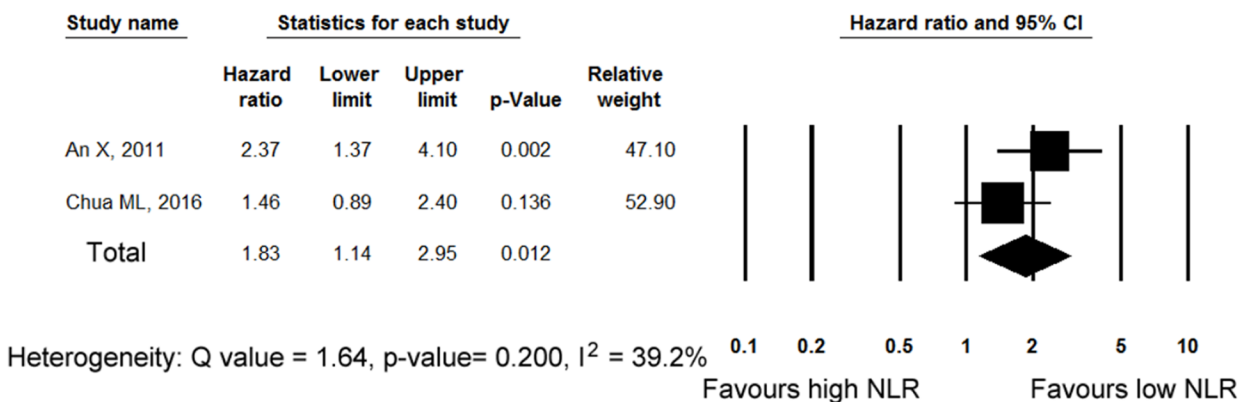

**Fig 3. Forest plot showing hazard ratios (HRs) for disease-specific survival (A), progression-free survival (B), and distant metastasis-free survival (C) for neutrophil-lymphocyte ratio (NLR).** The squares represent HRs for each study. The sizes of the squares and the horizontal lines crossing the squares represent the weight of the study in the meta-analysis and the 95% confidence intervals, respectively. The middle and width of the diamond indicates the pooled hazard ratio and its 95% confidence interval.

<https://doi.org/10.1371/journal.pone.0181478.g003>

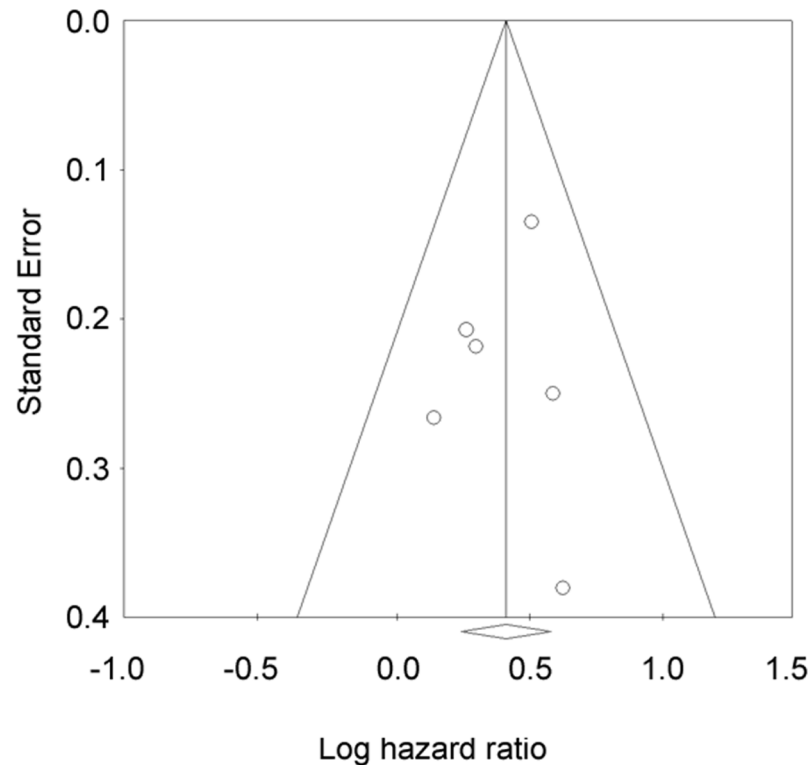

**Fig 4. Funnel plot of hazard ratios (HRs) for overall survival for neutrophil-lymphocyte ratio.**

<https://doi.org/10.1371/journal.pone.0181478.g004>

neutrophils, NLR was employed, and its association with prognosis of NPC has been investigated [9, 10, 12–18]. However, there existed some inconsistency among their results, and the prognostic ability of NLR for NPC is not conclusively determined yet.

In the present study, we aimed to assess the prognostic impact of NLR on NPC by conducting a meta-analysis of nine studies that enrolled 5397 patients. Although half of the studies regarding OS reported non-significant results, the combined HR for OS showed significantly poorer OS associated with elevated NLR. Similar results were obtained in the DSS, PFS, and DMFS analyses.

A number of meta-analyses on the association between NLR and cancer prognosis have been conducted [11, 38–48], all of which showed significant associations between elevated NLR and poor prognosis; however, the pooled HRs for OS differed considerably according to tumor sites. Pooled HRs for OS were less than 2 in cancers of the cervix, lung, prostate, kidney, esophagus, and kidney [38, 40, 42, 44, 46, 48] and were 2.03–2.56 in breast, colorectal, and liver cancers [39, 41, 47]. The pooled HR in patients with rectal cancer showed a singularly high value of 13.41 [43]. The pooled HR of 1.51 for OS in our study was comparable to those reported in many previous studies. The difference of effect size among tumor sites possibly emerges from the differences in biological characteristics of tumor cells and carcinogenic background.

The effect of elevated NLR on prognosis of NPC in this study was relatively small. To discern the group with the worse prognosis, biomarkers with more discrimination ability were desirable. Among blood-derived biomarkers, plasma EBV DNA is a reliable prognostic marker specific for NPC [6], and is also used for the detection and monitoring of NPC [49, 50]. A recent meta-analysis on the prognostic ability of pretreatment EBV DNA showed an HR of



2.78 for OS [51]. In the same report, posttreatment EBV DNA showed a further large impact (HR for OS = 5.43). Therefore, decision making based on plasma EBV DNA may be incorporated into clinical practice in the near future. However, measurement of plasma EBV DNA has not become a universally accepted clinical routine yet. Further, it is doubtful whether EBV DNA measurement will be available in all parts of the world. Therefore, other blood-derived markers readily measurable in any hospitals could be used as the second-best options. One of these candidates is serum lactate dehydrogenase (LDH). The HR of high LDH for OS in a meta-analysis was 1.79 [8], which is slightly larger than the HR of NLR in this study. Other hematologic markers, such as platelet-lymphocyte-ratio (PLR) [9, 15, 17] and lymphocyte-monocyte ratio (LMR) [10] are other candidates. Two of the studies included in our meta-analysis used PLR and NLR as covariates in the multivariate models of each study [9, 17]. In both studies, HRs of PLR for mortality were higher than those of NLR. Similarly, one study used LMR and NLR as covariates in a multivariate model, and LMR was a better prognostic indicator than NLR [10].

There are several limitations in this study. First, only nine studies were included in our analysis, and the number of studies for each outcome was further diminished. Second, some of the studies included other inflammatory markers, together with NLR, as covariates in multivariate models [9, 10, 15, 17]. These might lead to an underestimation of NLR. Third, we used summarized data of individual studies, and individual patient data were not collected. Fourth, the cutoff values for NLR were inconsistent among individual studies. This can cause heterogeneity. Because of the limited number of studies, we did not conduct a meta-regression analysis to investigate the relationship between cutoff values and the effect of NLR. Hence, we could not determine the optimal cutoff value for NLR to be used in clinical settings. In the meta-analysis for the association of NLR and the prognosis of solid tumors [11], the cutoff value of 5 showed the highest HR among various cutoff values examined. Similarly, the cutoff value of 5 employed in the study by Chen et al. [15] showed relatively high HR of 1.80 (Fig 2). Therefore, it could be better to use this cutoff value until further evidence accumulates.

In conclusion, although NLR was a significant prognostic factor for NPC, the effects of elevated NLR on OS, DSS, PFS, and DMFS were small. Therefore, further research on prognostic markers is required toward the improvement of NPC treatment.

## Supporting information

**S1 Fig. Sensitivity analysis of the relationship between neutrophil-lymphocyte count and overall survival, disease-specific survival and progression-free survival (A, B and C).**

(TIF)

**S1 Table. Prisma 2009 checklist.**

(DOC)

## Author Contributions

**Conceptualization:** Yukinori Takenaka.

**Data curation:** Yukinori Takenaka, Takahiro Kitamura.

**Formal analysis:** Yukinori Takenaka.

**Supervision:** Atsuhiko Uno.

**Writing – original draft:** Yukinori Takenaka.

**Writing – review & editing:** Takahiro Kitamura, Ryohei Oya, Naoki Ashida, Kotaro Shimizu, Kazuya Takemura, Yoshifumi Yamamoto, Atsuhiko Uno.

## References

1. Chang ET, Adami HO. The enigmatic epidemiology of nasopharyngeal carcinoma. *Cancer Epidemiol Biomarkers Prev* 2006; 15: 1765–1777. <https://doi.org/10.1158/1055-9965.EPI-06-0353> PMID: 17035381
2. Tumours of the Nasopharynx. In: Barnes Leon, Eveson John W., Reichart Peter, Sidransky David, editors. *World Health Organization Classification of Tumours, Pathology and Genetics of Head and Neck Tumours*. Lyon: IARC Press; 2005. p 781–106.
3. Chua ML, Wee JT, Hui EP, Chan AT. Nasopharyngeal carcinoma. *Lancet*. 2016; 387: 1012–1024. [https://doi.org/10.1016/S0140-6736\(15\)00055-0](https://doi.org/10.1016/S0140-6736(15)00055-0) PMID: 26321262
4. NCCN Guidelines Version 1.2017, Head and Neck Cancers, Cancer of the Nasopharynx. 2017; [https://www.nccn.org/professionals/physician\\_gls/pdf/head-and-neck.pdf](https://www.nccn.org/professionals/physician_gls/pdf/head-and-neck.pdf).
5. Ng WT, Chang AT, Lee SW, Sze HC, Lee AW. Chemotherapy for Nasopharyngeal Cancer: Neoadjuvant, Concomitant, and/or Adjuvant. *Curr Treat Options Oncol* 2015; 16: 44. <https://doi.org/10.1007/s11864-015-0361-5> PMID: 26187796
6. Wang WY, Twu CW, Chen HH, Jiang RS, Wu CT, Liang KL, et al. Long-term survival analysis of nasopharyngeal carcinoma by plasma Epstein-Barr virus DNA levels. *Cancer* 2013; 119: 963–970. <https://doi.org/10.1002/cncr.27853> PMID: 23065693
7. Chen WH, Tang LQ, Wang FW, Li CP, Tian XP, Huang XX, et al. Elevated levels of plasma D-dimer predict a worse outcome in patients with nasopharyngeal carcinoma. *BMC Cancer*. 2014; 14: 583. <https://doi.org/10.1186/1471-2407-14-583> PMID: 25109220
8. Zhou GQ, Tang LL, Mao YP, Chen L, Li WF, Sun Y, et al. Baseline serum lactate dehydrogenase levels for patients treated with intensity-modulated radiotherapy for nasopharyngeal carcinoma: a predictor of poor prognosis and subsequent liver metastasis. *Int J Radiat Oncol Biol Phys*. 2012; 82: e359–365. <https://doi.org/10.1016/j.ijrobp.2011.06.1967> PMID: 22000748
9. Li JP, Chen SL, Liu XM, He X, Xing S, Liu YJ, et al. A Novel Inflammation-Based Stage (I Stage) Predicts Overall Survival of Patients with Nasopharyngeal Carcinoma. *Int J Mol Sci*. 17: 2016.
10. Li XH, Chang H, Xu BQ, Tao YL, Gao J, Chen C, et al. An inflammatory biomarker-based nomogram to predict prognosis of patients with nasopharyngeal carcinoma: an analysis of a prospective study. *Cancer Med*. 2016; 6: 310–319. <https://doi.org/10.1002/cam4.947> PMID: 27860387
11. Templeton AJ, McNamara MG, Seruga B, Vera-Badillo FE, Aneja P, Ocana A, et al. Prognostic role of neutrophil-to-lymphocyte ratio in solid tumors: a systematic review and meta-analysis. *J Natl Cancer Inst*. 2014; 106: dju124.
12. An X, Ding PR, Wang FH, Jiang WQ, Li YH. Elevated neutrophil to lymphocyte ratio predicts poor prognosis in nasopharyngeal carcinoma. *Tumour Biol*. 2011; 32: 317–324. <https://doi.org/10.1007/s13277-010-0124-7> PMID: 21052888
13. He JR, Shen GP, Ren ZF, Qin H, Cui C, Zhang Y, et al. Pretreatment levels of peripheral neutrophils and lymphocytes as independent prognostic factors in patients with nasopharyngeal carcinoma. *Head Neck*. 2012; 34: 1769–1776. <https://doi.org/10.1002/hed.22008> PMID: 22318781
14. Chang H, Gao J, Xu BQ, Guo SP, Lu RB, Li G, et al. Haemoglobin, neutrophil to lymphocyte ratio and platelet count improve prognosis prediction of the TNM staging system in nasopharyngeal carcinoma: development and validation in 3,237 patients from a single institution. *Clin Oncol. (R Coll Radiol)* 2013; 25: 639–646.
15. Chen C, Sun P, Dai QS, Weng HW, Li HP, Ye S. The Glasgow Prognostic Score predicts poor survival in cisplatin-based treated patients with metastatic nasopharyngeal carcinoma. *PLoS One*. 2014; 9: e112581. <https://doi.org/10.1371/journal.pone.0112581> PMID: 25393117
16. Jin Y, Ye X, He C, Zhang B, Zhang Y. Pretreatment neutrophil-to-lymphocyte ratio as predictor of survival for patients with metastatic nasopharyngeal carcinoma. *Head Neck*. 2015; 37: 69–75. <https://doi.org/10.1002/hed.23565> PMID: 24327524
17. Sun W, Zhang L, Luo M, Hu G, Mei Q, Liu D, et al. Pretreatment hematologic markers as prognostic factors in patients with nasopharyngeal carcinoma: Neutrophil-lymphocyte ratio and platelet-lymphocyte ratio. *Head Neck*. 38 Suppl 2016; 1: E1332–1340.
18. Chua ML, Tan SH, Kusumawidjaja G, Shwe MT, Cheah SL, Fong KW, et al. Neutrophil-to-lymphocyte ratio as a prognostic marker in locally advanced nasopharyngeal carcinoma: A pooled analysis of two randomised controlled trials. *Eur J Cancer*. 2016; 67: 119–129. <https://doi.org/10.1016/j.ejca.2016.08.006> PMID: 27640138

19. Moher D, Liberati A, Tetzlaff J, Altman DG. Preferred reporting items for systematic reviews and meta-analyses: the PRISMA statement. *Ann Intern Med.* 2009; 151: 264–9, W64. PMID: [19622511](#)
20. GA Wells, B Shea, D O'Connell, Peterson J, Welch V, Losos M, et al. The Newcastle-Ottawa Scale (NOS) for assessing the quality of nonrandomised studies in meta-analyses. [http://www.ohri.ca/programs/clinical\\_epidemiology/oxford.asp](http://www.ohri.ca/programs/clinical_epidemiology/oxford.asp).
21. Riley CA, Marino MJ, Hawkey N, Lawlor CM, McCoul ED. Sinonasal Tract Inflammation as a Precursor to Nasopharyngeal Carcinoma: A Systematic Review and Meta-Analysis. *Otolaryngol Head Neck Surg.* 2016; 154: 810–816. <https://doi.org/10.1177/0194599816629436> PMID: [26908557](#)
22. Tsang CM, Tsao SW. The role of Epstein-Barr virus infection in the pathogenesis of nasopharyngeal carcinoma. *Virology.* 2015; 30: 107–121. <https://doi.org/10.1007/s12250-015-3592-5> PMID: [25910483](#)
23. Bruce JP, Yip K, Bratman SV, Ito E, Liu FF. Nasopharyngeal Cancer: Molecular Landscape. *J Clin Oncol.* 2015; 33: 3346–3355. <https://doi.org/10.1200/JCO.2015.60.7846> PMID: [26351340](#)
24. Mrizak D, Martin N, Barjon C, Jimenez-Pailhes AS, Mustapha R, Niki T, et al. Effect of nasopharyngeal carcinoma-derived exosomes on human regulatory T cells. *J Natl Cancer Inst.* 2015; 107: 363. <https://doi.org/10.1093/jnci/dju363> PMID: [25505237](#)
25. Samanta M, Takada K. Modulation of innate immunity system by Epstein-Barr virus-encoded non-coding RNA and oncogenesis. *Cancer Sci.* 2010; 101: 29–35. <https://doi.org/10.1111/j.1349-7006.2009.01377.x> PMID: [19886912](#)
26. Duan Y, Li Z, Cheng S, Chen Y, Zhang L, He J, et al. Nasopharyngeal carcinoma progression is mediated by EBV-triggered inflammation via the RIG-I pathway. *Cancer Lett.* 2015; 361: 67–74. <https://doi.org/10.1016/j.canlet.2015.02.037> PMID: [25721089](#)
27. Lai HC, Hsiao JR, Chen CW, Wu SY, Lee CH, Su IJ, et al. Endogenous latent membrane protein 1 in Epstein-Barr virus-infected nasopharyngeal carcinoma cells attracts T lymphocytes through upregulation of multiple chemokines. *Virology.* 2010; 405: 464–473. <https://doi.org/10.1016/j.virol.2010.06.037> PMID: [20637487](#)
28. Hsu MC, Hsiao JR, Chang KC, Wu YH, Su IJ, Jin YT, et al. Increase of programmed death-1-expressing intratumoral CD8 T cells predicts a poor prognosis for nasopharyngeal carcinoma. *Mod Pathol.* 2010; 23: 1393–1403. <https://doi.org/10.1038/modpathol.2010.130> PMID: [20657553](#)
29. Zhang YL, Li J, Mo HY, Qiu F, Zheng LM, Qian CN, et al. Different subsets of tumor infiltrating lymphocytes correlate with NPC progression in different ways. *Mol Cancer.* 2010; 9: 4. <https://doi.org/10.1186/1476-4598-9-4> PMID: [20064222](#)
30. Peng J, Ding T, Zheng LM, Shao JY. Influence of tumor-associated macrophages on progression and prognosis of nasopharyngeal carcinoma. *Ai Zhong.* 2006; 25: 1340–1345. PMID: [17094898](#)
31. Tao CJ, Chen YY, Jiang F, Feng XL, Jin QF, Jin T, et al. A prognostic model combining CD4/CD8 ratio and N stage predicts the risk of distant metastasis for patients with nasopharyngeal carcinoma treated by intensity modulated radiotherapy. *Oncotarget.* 2016; 7: 46653–46661. <https://doi.org/10.18632/oncotarget.9695> PMID: [27270307](#)
32. Xu T, Huang Z, Su B, Wang S, Wang D, Wang C, et al. Prognostic significance of circulating CD19+ B lymphocytes in EBV-associated nasopharyngeal carcinoma. *Med Oncol.* 2014; 31: 198. <https://doi.org/10.1007/s12032-014-0198-y> PMID: [25182703](#)
33. Hu FJ, Ge MH, Li P, Wang CC, Ling YT, Mao WM, et al. Unfavorable clinical implications of circulating CD44+ lymphocytes in patients with nasopharyngeal carcinoma undergoing radiochemotherapy. *Clin Chim Acta.* 2012; 413: 213–218. <https://doi.org/10.1016/j.cca.2011.09.026> PMID: [21983162](#)
34. Jiang R, Cai XY, Yang ZH, Yan Y, Zou X, Guo L, et al. Elevated peripheral blood lymphocyte-to-monocyte ratio predicts a favorable prognosis in the patients with metastatic nasopharyngeal carcinoma. *Chin J Cancer.* 2015; 34: 237–246. <https://doi.org/10.1186/s40880-015-0025-7> PMID: [26067059](#)
35. Li J, Jiang R, Liu WS, Liu Q, Xu M, Feng QS, et al. A large cohort study reveals the association of elevated peripheral blood lymphocyte-to-monocyte ratio with favorable prognosis in nasopharyngeal carcinoma. *PLoS One.* 2013; 8: e83069. <https://doi.org/10.1371/journal.pone.0083069> PMID: [24386144](#)
36. Luo XL, He W, Huang H, Chen QY, Liang Y, Mai HQ, et al. Design of a prognostic score model for nasopharyngeal carcinoma. *Head Neck.* 2015; 37: 624–629. <https://doi.org/10.1002/hed.23642> PMID: [24599631](#)
37. Xia WX, Zhang HB, Shi JL, Lu X, Wang L, Ye YF, et al. A prognostic model predicts the risk of distant metastasis and death for patients with nasopharyngeal carcinoma based on pre-treatment serum C-reactive protein and N-classification. *Eur J Cancer.* 2013; 49: 2152–2160. <https://doi.org/10.1016/j.ejca.2013.03.003> PMID: [23571148](#)
38. Wu J, Chen M, Liang C, Su W. Prognostic value of the pretreatment neutrophil-to-lymphocyte ratio in cervical cancer: a meta-analysis and systematic review. *Oncotarget.* 2017; 8: 13400–134712. <https://doi.org/10.18632/oncotarget.14541> PMID: [28077792](#)

39. Ethier JL, Desautels D, Templeton A, Shah PS, Amir E. Prognostic role of neutrophil-to-lymphocyte ratio in breast cancer: a systematic review and meta-analysis. *Breast Cancer Res.* 2017; 19: 2. <https://doi.org/10.1186/s13058-016-0794-1> PMID: 28057046
40. Yang HB, Xing M, Ma LN, Feng LX, Yu Z. Prognostic significance of neutrophil-lymphocyte ratio/platelet-lymphocyte ratio in lung cancers: a meta-analysis. *Oncotarget.* 2016; 7: 76769–76778. <https://doi.org/10.18632/oncotarget.12526> PMID: 27732958
41. Tsai PL, Su WJ, Leung WH, Lai CT, Liu CK. Neutrophil-lymphocyte ratio and CEA level as prognostic and predictive factors in colorectal cancer: A systematic review and meta-analysis. *J Cancer Res Ther.* 2016; 12: 582–589. <https://doi.org/10.4103/0973-1482.144356> PMID: 27461614
42. Cao J, Zhu X, Zhao X, Li XF, Xu R. Neutrophil-to-Lymphocyte Ratio Predicts PSA Response and Prognosis in Prostate Cancer: A Systematic Review and Meta-Analysis. *PLoS One.* 2016; 11: e0158770. <https://doi.org/10.1371/journal.pone.0158770> PMID: 27368058
43. Dong YW, Shi YQ, He LW, Su PZ. Prognostic significance of neutrophil-to-lymphocyte ratio in rectal cancer: a meta-analysis. *Onco Targets Ther.* 2016; 9: 3127–3134. <https://doi.org/10.2147/OTT.S103031> PMID: 27307753
44. Na N, Yao J, Cheng C, Huang Z, Hong L, Li H, et al. Meta-analysis of the efficacy of the pretreatment neutrophil-to-lymphocyte ratio as a predictor of prognosis in renal carcinoma patients receiving tyrosine kinase inhibitors. *Oncotarget.* 2016; 7: 44039–44046. <https://doi.org/10.18632/oncotarget.9836> PMID: 27270655
45. Cheng H, Long F, Jaiswar M, Yang L, Wang C, Zhou Z. Prognostic role of the neutrophil-to-lymphocyte ratio in pancreatic cancer: a meta-analysis. *Sci Rep.* 2015; 5: 11026. <https://doi.org/10.1038/srep11026> PMID: 26226887
46. Yang X, Huang Y, Feng JF, Liu JS. Prognostic significance of neutrophil-to-lymphocyte ratio in esophageal cancer: a meta-analysis. *Onco Targets Ther.* 2015; 8: 789–794. <https://doi.org/10.2147/OTT.S77099> PMID: 25914549
47. Xue TC, Zhang L, Xie XY, Ge NL, Li LX, Zhang BH, et al. Prognostic significance of the neutrophil-to-lymphocyte ratio in primary liver cancer: a meta-analysis. *PLoS One.* 2014; 9: e96072. <https://doi.org/10.1371/journal.pone.0096072> PMID: 24788770
48. Hu K, Lou L, Ye J, Zhang S. Prognostic role of the neutrophil-lymphocyte ratio in renal cell carcinoma: a meta-analysis. *BMJ Open.* 2015; 5: e006404. <https://doi.org/10.1136/bmjopen-2014-006404> PMID: 25854964
49. Leung SF, Tam JS, Chan AT, Zee B, Chan LY, Huang DP, et al. Improved accuracy of detection of nasopharyngeal carcinoma by combined application of circulating Epstein-Barr virus DNA and anti-Epstein-Barr viral capsid antigen IgA antibody. *Clin Chem.* 2004; 50: 339–345. <https://doi.org/10.1373/clinchem.2003.022426> PMID: 14684618
50. Chan AT, Lo YM, Zee B, Chan LY, Ma BB, Leung SF, et al. Plasma Epstein-Barr virus DNA and residual disease after radiotherapy for undifferentiated nasopharyngeal carcinoma. *J Natl Cancer Inst.* 2002; 94: 1614–1619. PMID: 12419787
51. Zhang J, Shu C, Song Y, Li Q, Huang J, Ma X. Epstein-Barr virus DNA level as a novel prognostic factor in nasopharyngeal carcinoma: A meta-analysis. *Medicine (Baltimore).* 2016; 95: e5130.
